# Supplementary material for: Initiators and promoters for the occurrence of screen-detected breast cancer and the progression to clinically-detected interval breast cancer
Source: PubMed Central journal article supplement — J Epidemiol. 2016 Nov 28;27(3):98–106. doi: 10.1016/j.je.2016.10.003 (PMC5363784; doi:10.1016/j.je.2016.10.003), 2016-11-28
Supplement: mmc1.pdf [file mmc1.pdf]

## eAppendix 1. Details of the statistical model

### Four-state continuous-time Markov model

We used a four-state homogenous Markov model to describe the natural history of breast cancer (**Figure 3**). The natural history of the disease was modeled with a continuous-time Markov process in which  $X(t)$ , the state of an individual at time  $t$ , is a random variable with a state space  $\Omega = \{0, 1, 2, 3\}$ , where 0 represents “free of breast cancer”, 1 for the PCDP, 2 for the CP, and 3 for deaths due to causes other than breast cancer.

We assigned the time of transition between states with exponential distributions due to the Markov property. States 2 and 3 are defined as the absorbing states. The transition rates in the four-state model can be expressed as an intensity matrix:

$$Q = \begin{matrix} & \begin{matrix} 0 & 1 & 2 & 3 \end{matrix} \\ \begin{matrix} 0 \\ 1 \\ 2 \\ 3 \end{matrix} & \begin{bmatrix} -(\lambda_1 + \mu_0) & \lambda_1 & 0 & \mu_0 \\ 0 & -(\lambda_2 + \mu_1) & \lambda_2 & \mu_1 \\ 0 & 0 & 0 & 0 \\ 0 & 0 & 0 & 0 \end{bmatrix} \end{matrix} \quad (\text{A1})$$

Based on the backward Kolmogorov equations, and according to the convention for denoting stochastic processes, the transition probability matrix  $\mathbf{P}(t)$ , where  $P_{ij}(t)$  denotes the transition probability from state  $i$  to state  $j$ , as related to  $\mathbf{Q}_t$ <sup>16-20</sup>, may be written as follows:

$$\frac{d}{dt} \mathbf{P}(t) = \mathbf{Q}_t \mathbf{P}(t) \quad t \geq 0 \quad (\text{A2})$$

subject to  $\mathbf{P}(0) = \mathbf{I}$

The matrix of transition probabilities denoted by  $\mathbf{P}(t)$  for transitions between states can be expressed as follows:

$$P(t) = \begin{pmatrix} P_{00}(t) & P_{01}(t) & P_{02}(t) & P_{03}(t) \\ 0 & P_{11}(t) & P_{12}(t) & P_{13}(t) \\ 0 & 0 & 1 & 0 \\ 0 & 0 & 0 & 1 \end{pmatrix} \quad (\text{A3})$$

The elements in the transition probability matrix  $\mathbf{P}(t)$  are functions of  $\lambda$ s, and  $\mu$ s.

### **Incorporation of patient-specific covariates**

The effect of patient-specific covariates (e.g.,  $x$ ) on the four-state Markov model was assessed by the exponential regression model. It is expressed as follows:

$$\lambda_i^m = \lambda_{i0} \exp(\beta_i \chi^m) \quad (\text{A4})$$

where  $\lambda_{i0}$  denotes the baseline transition rate  $i$  ( $i=1, 2$ ), where  $\chi^m$  is a vector of covariates for subject  $m$  and where  $\beta_i$  is a vector for the corresponding regression coefficients.

**eTable 1.** The layout of data used for the four-state Markov model

| Age          | Screen-detected | Interval cancer | Women free of breast cancer |                  | Women in the PCDP |                 |
|--------------|-----------------|-----------------|-----------------------------|------------------|-------------------|-----------------|
|              |                 |                 | OCD                         | Women-years      | OCD               | Women-years     |
| 40           | 17              | 3               | 46                          | 48,958           | 0                 | 146.6           |
| 41           | 11              | 10              | 37                          | 48,140           | 0                 | 102.5           |
| 42           | 18              | 11              | 49                          | 47,713           | 0                 | 127.2           |
| 43           | 12              | 5               | 42                          | 48,401           | 0                 | 83.6            |
| 44           | 21              | 12              | 62                          | 49,064           | 1                 | 157.1           |
| 45           | 23              | 17              | 63                          | 48,469           | 2                 | 194.2           |
| 46           | 22              | 20              | 83                          | 49,354           | 0                 | 172.2           |
| 47           | 35              | 20              | 76                          | 50,763           | 0                 | 323.7           |
| 48           | 44              | 24              | 81                          | 51,512           | 1                 | 356.1           |
| 49           | 39              | 19              | 87                          | 51,255           | 1                 | 340.6           |
| 50           | 57              | 27              | 99                          | 51,805           | 1                 | 460.1           |
| 51           | 52              | 27              | 110                         | 52,558           | 1                 | 458.2           |
| 52           | 57              | 29              | 139                         | 52,086           | 0                 | 464.9           |
| 53           | 39              | 36              | 126                         | 51,979           | 0                 | 270.2           |
| 54           | 55              | 32              | 144                         | 51,638           | 2                 | 446.5           |
| 55           | 45              | 33              | 171                         | 51,699           | 0                 | 352.6           |
| 56           | 60              | 20              | 173                         | 52,037           | 4                 | 433.2           |
| 57           | 75              | 25              | 210                         | 53,028           | 4                 | 563.5           |
| 58           | 65              | 33              | 217                         | 53,251           | 2                 | 435.4           |
| 59           | 72              | 29              | 241                         | 51,631           | 4                 | 501.4           |
| 60           | 66              | 33              | 258                         | 50,058           | 6                 | 464.1           |
| 61           | 83              | 35              | 282                         | 50,045           | 7                 | 514.4           |
| 62           | 84              | 27              | 318                         | 48,162           | 4                 | 595.2           |
| 63           | 103             | 31              | 333                         | 47,594           | 7                 | 715.5           |
| 64           | 88              | 37              | 392                         | 46,879           | 4                 | 619.0           |
| 65           | 102             | 43              | 466                         | 45,078           | 7                 | 707.4           |
| 66           | 110             | 35              | 448                         | 44,611           | 11                | 619.0           |
| 67           | 85              | 34              | 515                         | 44,328           | 5                 | 572.2           |
| 68           | 99              | 32              | 515                         | 43,165           | 23                | 591.3           |
| 69           | 106             | 27              | 656                         | 41,723           | 22                | 710.2           |
| 70+          | 179             | 245             | 2,084                       | 67,211           | 63                | 1,282.6         |
| <b>Total</b> | <b>1,924</b>    | <b>1,011</b>    | <b>8,523</b>                | <b>1,544,195</b> | <b>182</b>        | <b>13,780.7</b> |

OCD, other causes of death; PCDP, pre-clinical detectable phase.

**eTable 2.** The frequency of risk factors by detection mode during the period of 1977-2010

| Risk factors                            | Free of breast cancer | Breast cancer | Detection Mode  |                     | <i>P</i> value* | <i>P</i> value† |
|-----------------------------------------|-----------------------|---------------|-----------------|---------------------|-----------------|-----------------|
|                                         |                       |               | Screen-detected | Clinically detected |                 |                 |
| <b>Period</b>                           | <b>49,345</b>         | <b>1,321</b>  | <b>789</b>      | <b>532</b>          |                 |                 |
| <b>1977-1992</b>                        |                       |               |                 |                     |                 |                 |
| BMI, kg/m <sup>2</sup>                  |                       |               |                 |                     | 0.091           | 0.005           |
| <25                                     | 19,535<br>(49.0)      | 335 (45.9)    | 175 (40.3)      | 160 (54.1)          |                 |                 |
| ≥25                                     | 20,299<br>(51.0)      | 395 (54.1)    | 259 (59.7)      | 136 (45.9)          |                 |                 |
| Age at menarche, years                  |                       |               |                 |                     | 0.405           | 0.423           |
| ≤11                                     | 1,216 (3.89)          | 34 (4.86)     | 23 (5.58)       | 11 (3.82)           |                 |                 |
| 12-13                                   | 12,826<br>(41.0)      | 288 (41.1)    | 173 (42.0)      | 115 (39.9)          |                 |                 |
| ≥14                                     | 17,244<br>(55.1)      | 378 (54.0)    | 216 (52.4)      | 162 (56.2)          |                 |                 |
| Age at first full-term pregnancy, years |                       |               |                 |                     | 0.000           | 0.322           |
| ≤25                                     | 31,225<br>(68.1)      | 786 (63.2)    | 465 (62.1)      | 321 (64.9)          | 2               |                 |
| >25                                     | 14,612<br>(31.9)      | 458 (36.8)    | 284 (37.9)      | 174 (35.2)          |                 |                 |
| Breast density                          |                       |               |                 |                     | 0.909           | 0.435           |
| Non-dense                               | 35,580<br>(83.8)      | 832 (84.0)    | 514 (84.7)      | 318 (82.8)          |                 |                 |
| Dense                                   | 6,868 (16.2)          | 159 (16.0)    | 93 (15.3)       | 66 (17.2)           |                 |                 |
| Family history                          |                       |               |                 |                     | 0.051           | 0.199           |
| No                                      | 35,771<br>(96.2)      | 693 (94.8)    | 401 (93.9)      | 292 (96.1)          |                 |                 |
| Yes                                     | 1,414 (3.80)          | 38 (5.20)     | 26 (6.09)       | 12 (3.95)           |                 |                 |
| <b>Period 1996-1998 &amp; 2002-2010</b> |                       |               |                 |                     |                 |                 |

| Risk factors             | Free of<br>breast cancer | Breast<br>cancer | Detection Mode      |                     | <i>P</i><br>value<br>* | <i>P</i><br>value† |
|--------------------------|--------------------------|------------------|---------------------|---------------------|------------------------|--------------------|
|                          |                          |                  | Screen-<br>detected | Clinically detected |                        |                    |
| Estrogen<br>receptor     |                          |                  |                     |                     |                        | <0.001             |
| Neg.                     |                          |                  | 94 (10.9)           | 101 (26.8)          |                        |                    |
| Pos.                     |                          |                  | 768 (89.1)          | 276 (73.2)          |                        |                    |
| Progesterone<br>receptor |                          |                  |                     |                     |                        | <0.001             |
| Neg.                     |                          |                  | 267 (31.1)          | 171 (45.8)          |                        |                    |
| Pos.                     |                          |                  | 593 (68.9)          | 202 (54.2)          |                        |                    |
| HER-2                    |                          |                  |                     |                     |                        | 0.023              |
| Neg.                     |                          |                  | 626 (88.5)          | 232 (83.2)          |                        |                    |
| Pos.                     |                          |                  | 81 (11.5)           | 47 (16.8)           |                        |                    |
| Triple-negative          |                          |                  |                     |                     |                        | <0.001             |
| Yes                      |                          |                  | 42 (6.0)            | 55 (20.1)           |                        |                    |
| No                       |                          |                  | 660 (94.0)          | 219 (79.9)          |                        |                    |
| Ki-67                    |                          |                  |                     |                     |                        | <0.001             |
| Neg.                     |                          |                  | 272 (67.0)          | 73 (44.0)           |                        |                    |
| Pos.                     |                          |                  | 134 (33.0)          | 93 (56.0)           |                        |                    |
| Basal phenotype          |                          |                  |                     |                     |                        | <0.001             |
| Non-basal                |                          |                  | 418 (95.4)          | 142 (81.6)          |                        |                    |
| Basal-like               |                          |                  | 20 (4.6)            | 32 (18.4)           |                        |                    |
| Molecular subtypes       |                          |                  |                     |                     |                        | 0.008              |
| Luminal A                |                          |                  | 122 (81.3)          | 46 (63.9)           |                        |                    |
| Luminal B                |                          |                  | 11 (7.33)           | 8 (11.1)            |                        |                    |
| HER2+                    |                          |                  | 8 (5.33)            | 3 (4.17)            |                        |                    |
| Basal-like               |                          |                  | 5 (3.33)            | 11 (15.3)           |                        |                    |
| Triple-negative          |                          |                  | 4 (2.67)            | 4 (5.56)            |                        |                    |

BMI, body mass index.

Data are presented as a number followed by a percentage in parentheses

\* *P* value for initiators

† *P* value for promoters

**Table 3.** Estimated incidence of preclinical breast cancer ( $\hat{\lambda}_1$ ), the transition rate from the pre-clinical to the clinical phase ( $\hat{\lambda}_2$ ), and the mean sojourn time by body mass index, age at first full-term pregnancy, breast density, family history, and molecular subtypes

| BMI, kg/m <sup>2</sup> | Age at first full-term pregnancy, years | Breast density | Family History | Molecular subtypes | $\hat{\lambda}_1$ | $\hat{\lambda}_2$ | MST  | $\frac{MST}{\hat{\lambda}_1}$ |
|------------------------|-----------------------------------------|----------------|----------------|--------------------|-------------------|-------------------|------|-------------------------------|
| ≥25                    | >25                                     | Dense          | Yes            | Triple-negative    | 0.0036            | 0.57              | 1.77 | 486                           |
| ≥25                    | >25                                     | Dense          | Yes            | Basal-like         | 0.0036            | 1.16              | 0.86 | 237                           |
| ≥25                    | >25                                     | Dense          | Yes            | HER2+              | 0.0036            | 0.41              | 2.42 | 665                           |
| ≥25                    | >25                                     | Dense          | Yes            | Luminal B          | 0.0036            | 0.48              | 2.10 | 578                           |
| ≥25                    | >25                                     | Dense          | Yes            | Luminal A          | 0.0036            | 0.27              | 3.64 | 1003                          |
| ≥25                    | >25                                     | Dense          | No             | Triple-negative    | 0.0019            | 0.57              | 1.77 | 920                           |
| ≥25                    | >25                                     | Dense          | No             | Basal-like         | 0.0019            | 1.16              | 0.86 | 448                           |
| ≥25                    | >25                                     | Dense          | No             | HER2+              | 0.0019            | 0.41              | 2.42 | 1258                          |
| ≥25                    | >25                                     | Dense          | No             | Luminal B          | 0.0019            | 0.48              | 2.10 | 1093                          |
| ≥25                    | >25                                     | Dense          | No             | Luminal A          | 0.0019            | 0.27              | 3.64 | 1896                          |
| ≥25                    | >25                                     | Non-dense      | Yes            | Triple-negative    | 0.0026            | 0.39              | 2.58 | 1004                          |
| ≥25                    | >25                                     | Non-dense      | Yes            | Basal-like         | 0.0026            | 0.80              | 1.26 | 489                           |
| ≥25                    | >25                                     | Non-dense      | Yes            | HER2+              | 0.0026            | 0.28              | 3.53 | 1374                          |
| ≥25                    | >25                                     | Non-dense      | Yes            | Luminal B          | 0.0026            | 0.33              | 3.06 | 1193                          |
| ≥25                    | >25                                     | Non-dense      | Yes            | Luminal A          | 0.0026            | 0.19              | 5.32 | 2071                          |
| ≥25                    | >25                                     | Non-dense      | No             | Triple-negative    | 0.0014            | 0.39              | 2.58 | 1899                          |
| ≥25                    | >25                                     | Non-dense      | No             | Basal-like         | 0.0014            | 0.80              | 1.26 | 924                           |
| ≥25                    | >25                                     | Non-dense      | No             | HER2+              | 0.0014            | 0.28              | 3.53 | 2598                          |
| ≥25                    | >25                                     | Non-dense      | No             | Luminal B          | 0.0014            | 0.33              | 3.06 | 2257                          |
| ≥25                    | >25                                     | Non-dense      | No             | Luminal A          | 0.0014            | 0.19              | 5.32 | 3916                          |
| ≥25                    | ≤25                                     | Dense          | Yes            | Triple-negative    | 0.0029            | 0.57              | 1.77 | 600                           |
| ≥25                    | ≤25                                     | Dense          | Yes            | Basal-like         | 0.0029            | 1.16              | 0.86 | 292                           |
| ≥25                    | ≤25                                     | Dense          | Yes            | HER2+              | 0.0029            | 0.41              | 2.42 | 821                           |
| ≥25                    | ≤25                                     | Dense          | Yes            | Luminal B          | 0.0029            | 0.48              | 2.10 | 713                           |
| ≥25                    | ≤25                                     | Dense          | Yes            | Luminal A          | 0.0029            | 0.27              | 3.64 | 1237                          |
| ≥25                    | ≤25                                     | Dense          | No             | Triple-negative    | 0.0016            | 0.57              | 1.77 | 1135                          |
| ≥25                    | ≤25                                     | Dense          | No             | Basal-like         | 0.0016            | 1.16              | 0.86 | 552                           |
| ≥25                    | ≤25                                     | Dense          | No             | HER2+              | 0.0016            | 0.41              | 2.42 | 1552                          |
| ≥25                    | ≤25                                     | Dense          | No             | Luminal B          | 0.0016            | 0.48              | 2.10 | 1348                          |
| ≥25                    | ≤25                                     | Dense          | No             | Luminal A          | 0.0016            | 0.27              | 3.64 | 2340                          |
| ≥25                    | ≤25                                     | Non-dense      | Yes            | Triple-negative    | 0.0021            | 0.39              | 2.58 | 1239                          |
| ≥25                    | ≤25                                     | Non-dense      | Yes            | Basal-like         | 0.0021            | 0.80              | 1.26 | 603                           |
| ≥25                    | ≤25                                     | Non-dense      | Yes            | HER2+              | 0.0021            | 0.28              | 3.53 | 1695                          |
| ≥25                    | ≤25                                     | Non-dense      | Yes            | Luminal B          | 0.0021            | 0.33              | 3.06 | 1472                          |
| ≥25                    | ≤25                                     | Non-dense      | Yes            | Luminal A          | 0.0021            | 0.19              | 5.32 | 2555                          |
| ≥25                    | ≤25                                     | Non-dense      | No             | Triple-negative    | 0.0011            | 0.39              | 2.58 | 2344                          |
| ≥25                    | ≤25                                     | Non-dense      | No             | Basal-like         | 0.0011            | 0.80              | 1.26 | 1141                          |

| BMI,<br>kg/m <sup>2</sup> | Age at<br>first<br>full-term<br>pregnancy,<br>years | Breast<br>density | Family<br>History | Molecular<br>subtypes | $\hat{\lambda}_1$ | $\hat{\lambda}_2$ | MST  | $\frac{\text{MST}}{\hat{\lambda}_1}$ |
|---------------------------|-----------------------------------------------------|-------------------|-------------------|-----------------------|-------------------|-------------------|------|--------------------------------------|
| ≥25                       | ≤25                                                 | Non-dense         | No                | HER2+                 | 0.0011            | 0.28              | 3.53 | 3206                                 |
| ≥25                       | ≤25                                                 | Non-dense         | No                | Luminal B             | 0.0011            | 0.33              | 3.06 | 2785                                 |
| ≥25                       | ≤25                                                 | Non-dense         | No                | Luminal A             | 0.0011            | 0.19              | 5.32 | 4833                                 |
| <25                       | >25                                                 | Dense             | Yes               | Triple-negative       | 0.0032            | 0.87              | 1.14 | 362                                  |
| <25                       | >25                                                 | Dense             | Yes               | Basal-like            | 0.0032            | 1.80              | 0.56 | 176                                  |
| <25                       | >25                                                 | Dense             | Yes               | HER2+                 | 0.0032            | 0.64              | 1.56 | 495                                  |
| <25                       | >25                                                 | Dense             | Yes               | Luminal B             | 0.0032            | 0.74              | 1.36 | 430                                  |
| <25                       | >25                                                 | Dense             | Yes               | Luminal A             | 0.0032            | 0.42              | 2.36 | 746                                  |
| <25                       | >25                                                 | Dense             | No                | Triple-negative       | 0.0017            | 0.87              | 1.14 | 684                                  |
| <25                       | >25                                                 | Dense             | No                | Basal-like            | 0.0017            | 1.80              | 0.56 | 333                                  |
| <25                       | >25                                                 | Dense             | No                | HER2+                 | 0.0017            | 0.64              | 1.56 | 936                                  |
| <25                       | >25                                                 | Dense             | No                | Luminal B             | 0.0017            | 0.74              | 1.36 | 813                                  |
| <25                       | >25                                                 | Dense             | No                | Luminal A             | 0.0017            | 0.42              | 2.36 | 1411                                 |
| <25                       | >25                                                 | Non-dense         | Yes               | Triple-negative       | 0.0022            | 0.60              | 1.67 | 747                                  |
| <25                       | >25                                                 | Non-dense         | Yes               | Basal-like            | 0.0022            | 1.23              | 0.81 | 364                                  |
| <25                       | >25                                                 | Non-dense         | Yes               | HER2+                 | 0.0022            | 0.44              | 2.28 | 1022                                 |
| <25                       | >25                                                 | Non-dense         | Yes               | Luminal B             | 0.0022            | 0.50              | 1.98 | 888                                  |
| <25                       | >25                                                 | Non-dense         | Yes               | Luminal A             | 0.0022            | 0.29              | 3.44 | 1541                                 |
| <25                       | >25                                                 | Non-dense         | No                | Triple-negative       | 0.0012            | 0.60              | 1.67 | 1413                                 |
| <25                       | >25                                                 | Non-dense         | No                | Basal-like            | 0.0012            | 1.23              | 0.81 | 688                                  |
| <25                       | >25                                                 | Non-dense         | No                | HER2+                 | 0.0012            | 0.44              | 2.28 | 1934                                 |
| <25                       | >25                                                 | Non-dense         | No                | Luminal B             | 0.0012            | 0.50              | 1.98 | 1679                                 |
| <25                       | >25                                                 | Non-dense         | No                | Luminal A             | 0.0012            | 0.29              | 3.44 | 2915                                 |
| <25                       | ≤25                                                 | Dense             | Yes               | Triple-negative       | 0.0026            | 0.87              | 1.14 | 447                                  |
| <25                       | ≤25                                                 | Dense             | Yes               | Basal-like            | 0.0026            | 1.80              | 0.56 | 217                                  |
| <25                       | ≤25                                                 | Dense             | Yes               | HER2+                 | 0.0026            | 0.64              | 1.56 | 611                                  |
| <25                       | ≤25                                                 | Dense             | Yes               | Luminal B             | 0.0026            | 0.74              | 1.36 | 531                                  |
| <25                       | ≤25                                                 | Dense             | Yes               | Luminal A             | 0.0026            | 0.42              | 2.36 | 921                                  |
| <25                       | ≤25                                                 | Dense             | No                | Triple-negative       | 0.0014            | 0.87              | 1.14 | 845                                  |
| <25                       | ≤25                                                 | Dense             | No                | Basal-like            | 0.0014            | 1.80              | 0.56 | 411                                  |
| <25                       | ≤25                                                 | Dense             | No                | HER2+                 | 0.0014            | 0.64              | 1.56 | 1155                                 |
| <25                       | ≤25                                                 | Dense             | No                | Luminal B             | 0.0014            | 0.74              | 1.36 | 1004                                 |
| <25                       | ≤25                                                 | Dense             | No                | Luminal A             | 0.0014            | 0.42              | 2.36 | 1742                                 |
| <25                       | ≤25                                                 | Non-dense         | Yes               | Triple-negative       | 0.0018            | 0.60              | 1.67 | 922                                  |
| <25                       | ≤25                                                 | Non-dense         | Yes               | Basal-like            | 0.0018            | 1.23              | 0.81 | 449                                  |
| <25                       | ≤25                                                 | Non-dense         | Yes               | HER2+                 | 0.0018            | 0.44              | 2.28 | 1262                                 |
| <25                       | ≤25                                                 | Non-dense         | Yes               | Luminal B             | 0.0018            | 0.50              | 1.98 | 1096                                 |
| <25                       | ≤25                                                 | Non-dense         | Yes               | Luminal A             | 0.0018            | 0.29              | 3.44 | 1902                                 |
| <25                       | ≤25                                                 | Non-dense         | No                | Triple-negative       | 0.0010            | 0.60              | 1.67 | 1744                                 |
| <25                       | ≤25                                                 | Non-dense         | No                | Basal-like            | 0.0010            | 1.23              | 0.81 | 849                                  |
| <25                       | ≤25                                                 | Non-dense         | No                | HER2+                 | 0.0010            | 0.44              | 2.28 | 2386                                 |
| <25                       | ≤25                                                 | Non-dense         | No                | Luminal B             | 0.0010            | 0.50              | 1.98 | 2073                                 |
| <25                       | ≤25                                                 | Non-dense         | No                | Luminal A             | 0.0010            | 0.29              | 3.44 | 3597                                 |

BMI, body mass index; MST, mean sojourn time.
